# Supplementary material for: Class II Phosphoinositide 3-Kinase Regulates Exocytosis of Insulin Granules in Pancreatic β Cells
Source: PubMed Central journal article supplement — J Biol Chem. 2010 Dec 2;286(6):4216–25. doi: 10.1074/jbc.M110.200295 (PMC3039383; doi:10.1074/jbc.m110.200295), 2010-12-02

**CLASS II PHOSPHOINOSITIDE 3-KINASE REGULATES EXOCYTOSIS  
OF INSULIN GRANULES IN PANCREATIC BETA CELLS**

**Veronica Dominguez<sup>1</sup>, Claudio Raimondi<sup>1</sup>, Sangeeta Somanath<sup>1</sup>, Marco Bugliani<sup>2</sup>,  
Merewyn K. Loder<sup>3</sup>, Charlotte E. Edling<sup>1</sup>, Nullin Divecha<sup>4</sup>, Gabriela da Silva-Xavier<sup>3</sup>,  
Lorella Marselli<sup>2</sup>, Shanta J. Persaud<sup>5</sup>, Mark D. Turner<sup>1</sup>, Guy A. Rutter<sup>3</sup>, Piero Marchetti<sup>2</sup>,  
Marco Falasca<sup>1</sup> and Tania Maffucci<sup>1</sup>**

**SUPPLEMENTAL DATA**

## SUPPLEMENTARY FIGURE LEGENDS

**Fig. S1. PI3K-C2 $\alpha$  downregulation affects insulin secretion.** *A*, Insulin secretion was determined upon stimulation of the indicated stable cell lines with 60 mM KCl for 30 min. Data are means  $\pm$  SEM from 21 independent experiments performed in duplicate. Total secreted insulin for each sample (pg insulin) was normalized by the total protein content ( $\mu$ g protein) and then expressed as fold increase over the unstimulated “sh scrambled” cells. Student’s t-Test  $^* = p < 0.001$ . *B*, Insulin secretion was determined upon stimulation of the indicated stable cell lines with 20 mM glucose for 30 min. Data are means  $\pm$  SEM from 3 independent experiments performed in duplicate. Total secreted insulin for each sample (pg insulin) was normalized by the total protein content ( $\mu$ g protein) and then expressed as fold increase over each unstimulated condition. Student’s t-Test  $^{**} = p < 0.05$ .

**Fig. S2. Analysis of IRS2 tyrosine phosphorylation.** The indicated cells were stimulated with 100 nM insulin, 60 mM KCl for 30 min (*A*) or the secretagogue cocktail for 3h (*B*). Tyrosine phosphorylation of IRS2 was determined in Western blot analysis upon immunoprecipitation. Membranes were then stripped to determine the total amount of immunoprecipitated IRS2.

**Fig. S3. Confocal microscopy analysis of syntaxin 1 and VAMP.** Representative images of syntaxin 1 and VAMP1/2/3 in the indicated cells analyzed as described in Experimental Procedures.

**Fig. S4. Confocal microscopy analysis of syntaxin 1 and SNAP25.** Confocal microscopy images of syntaxin 1 and SNAP25 in the indicated cells. DAPI stained the nuclei.

**Figure S1**

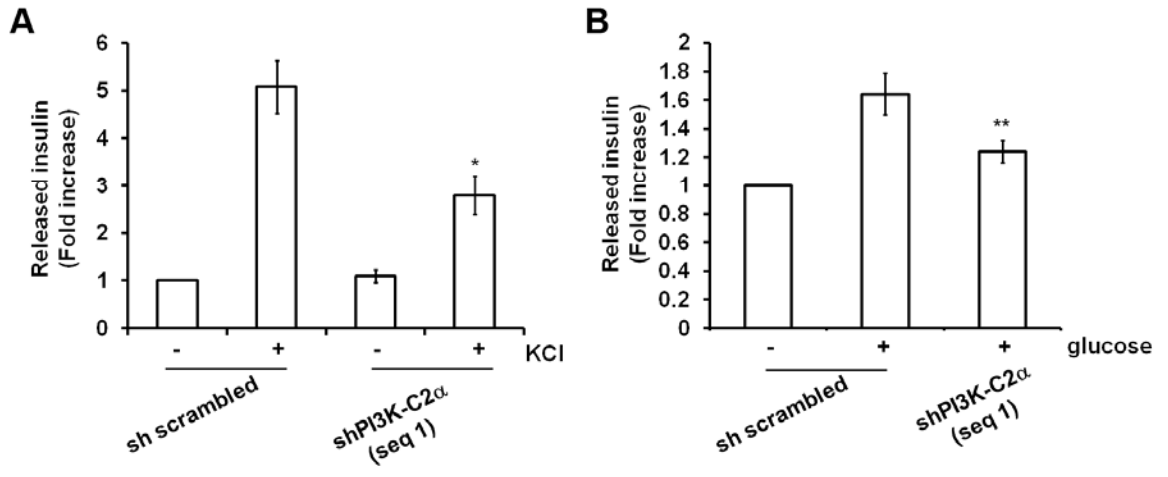

**Figure S2**

**A**

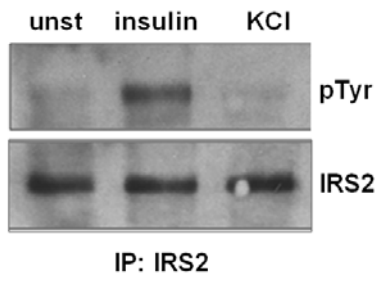

**B**

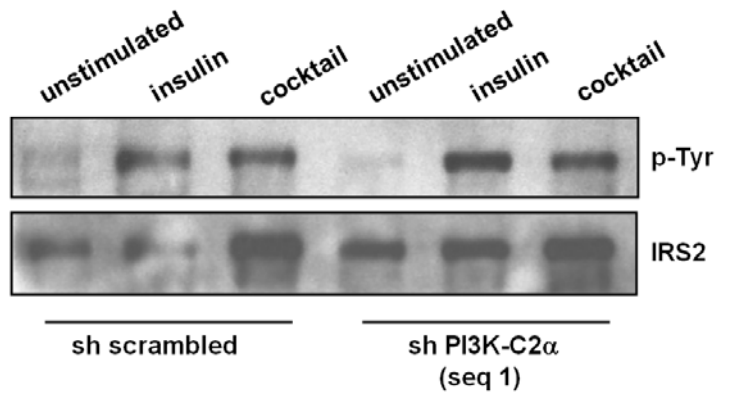

**Figure S3**

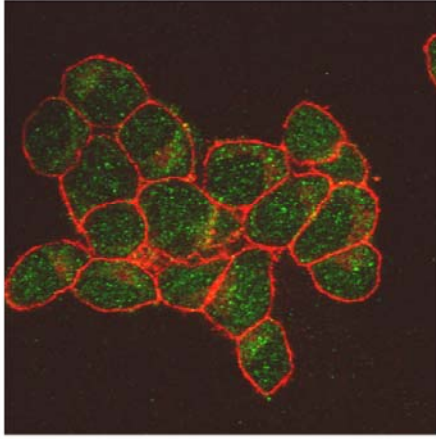

sh scrambled

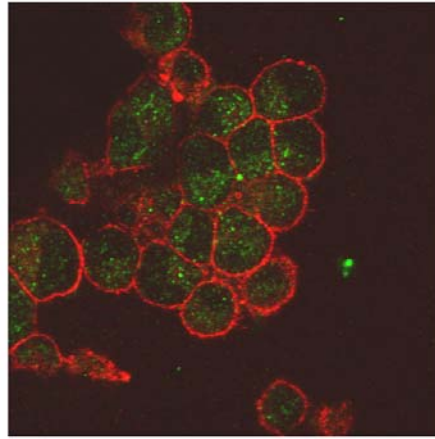

sh PI3K-C2 $\alpha$  (seq 1)

Syntaxin 1  
VAMP

Figure S4

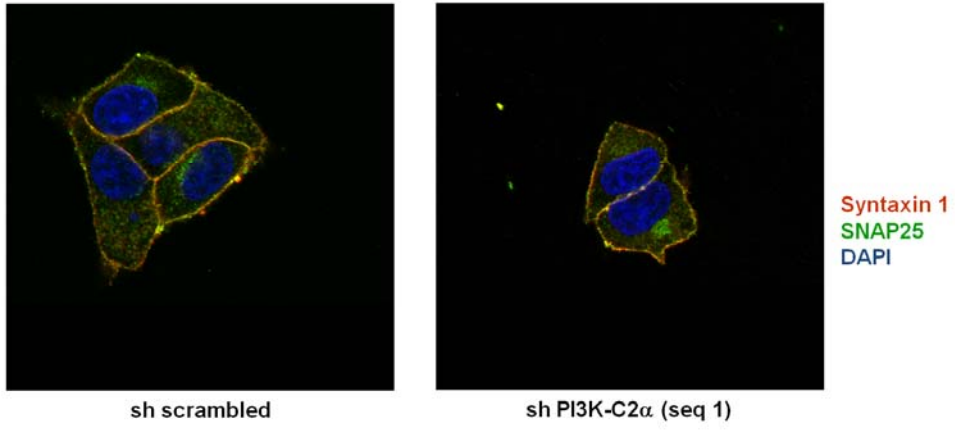

Supplement: supp_M110.200295_jbc.M110.200295-1.pdf [file supp_M110.200295_jbc.M110.200295-1.pdf]
